# Supplementary material for: Monitoring and Discussing Health-Related Quality of Life in Adolescents With Type 1 Diabetes Improve Psychosocial Well-Being
Source: Oxford University Press journal article supplement (doi:10.2337/dc08-0394), 2008-06-07
Supplement: dc080394-sup-online_only_appendix_a1.doc [file dc080394-sup-online_only_appendix_a1.doc]

**Table A1 – Physical and psychosocial well-being at baseline and follow-up**

|  | **HRQoL intervention group** | | |  | **control group** | | |
| --- | --- | --- | --- | --- | --- | --- | --- |
| **Outcome measures** | baseline | follow-up | p-value |  | baseline | follow-up | p-value |
| **CHQ-CF87** |  |  |  |  |  |  |  |
| Global health | 70.69 ± 19.58 | 74.55 ± 19.30 |  |  | 67.37 ± 17.77 | 64.47 ± 17.00 | ns |
| Physical functioning | 96.95 ± 4.87 | 98.37 ± 4.29 | ns |  | 97.66 ± 3.49 | 97.66 ± 3.70 | ns |
| Role/social limitations – emotional | 88.89 ± 16.86 | 94.77 ± 12.61 | ns |  | 94.59 ± 10.68 | 93.99 ± 14.24 | ns |
| Role/social limitations – behavior | 95.10 ± 10.66 | 98.04 ± 6.40 | ns |  | 97.00 ± 9.31 | 96.40 ± 11.12 | ns |
| Role/social limitations – physical | 93.33 ± 16.07 | 98.73 ± 4.49 | ns |  | 91.39 ± 13.43 | 96.10 ± 13.15 | ns |
| Bodily pain | 75.59 ± 24.51 | 82.94 ± 16.97 | ns |  | 78.12 ± 11.38 | 78.65 ± 18.58 | ns |
| Global behavior | 72.58 ± 16.40 | 79.24 ± 19.17 | ns |  | 75.83 ± 16.79 | 72.64 ± 13.97 | ns |
| Behavior | 83.00 ± 9.35 | 86.91 ± 9.25 | 0.001 |  | 84.08 ± 11.07 | 83.07 ± 8.40 | ns |
| Mental health | 76.65 ± 11.01 | 80.38 ± 11.26 | 0.047 |  | 78.42 ± 11.12 | 80.53 ± 10.14 | ns |
| Self esteem | 74.84 ± 10.43 | 79.94 ± 10.44 | 0.009 |  | 75.97 ± 10.63 | 75.97 ± 8.71 | ns |
| General health | 69.26 ± 14.79 | 72.71 ± 14.41 | ns |  | 65.41 ± 15.03 | 66.53 ± 15.49 | ns |
| Change in health | 59.84 ± 25.33 | 58.09 ± 25.91 | ns |  | 58.52 ± 23.21 | 66.18 ± 21.22 | ns |
| Family activities | 83.70 ± 15.26 | 88.73 ± 12.29 | 0.023 |  | 85.09 ± 12.28 | 87.94 ± 14.30 | ns |
| Family cohesion | 73.97 ± 22.45 | 75.44 ± 22.31 |  |  | 75.00 ± 20.73 | 69.47 ± 19.13 | ns |
| Physical health summary scores | 84.31 ± 10.85 | 88.18 ± 7.02 | ns |  | 82.70 ± 9.35 | 83.67 ± 11.09 | ns |
| Psychosocial health summary score | 83.70 ± 8.70 | 88.01 ± 6.10 | 0.002 |  | 85.82 ± 7.47 | 85.18 ± 8.19 | ns |
| **CES-D** | 8.37 ± 6.12 | 6.88 ± 5.73 | ns |  | 7.01 ± 5.19 | 5.84 ± 4.80 | ns |
| **DFCS** | 25.42 ± 4.98 | 24.39 ± 4.84 | ns |  | 25.03 ± 5.49 | 24.87 ± 6.13 | ns |

Table A1 - Data are means ± SD. CHQ-CF87, Child Health Questionnaire-Child Form 87 items; CES-D, Centre for Epidemiological Studies scale for Depression; DFCS, Diabetes Family Conflict Scale.
